# Supplementary material for: Developing an International Standard Set of Patient-Reported Outcome Measures for Psychotic Disorders
Source: Atypon-hosted journal article supplement (doi:10.1176/appi.ps.202000888), 2021-08-09
Supplement: appi.ps.202000888.ds001.pdf [file appi.ps.202000888.ds001.pdf]

PRISMA Diagram: Literature search results

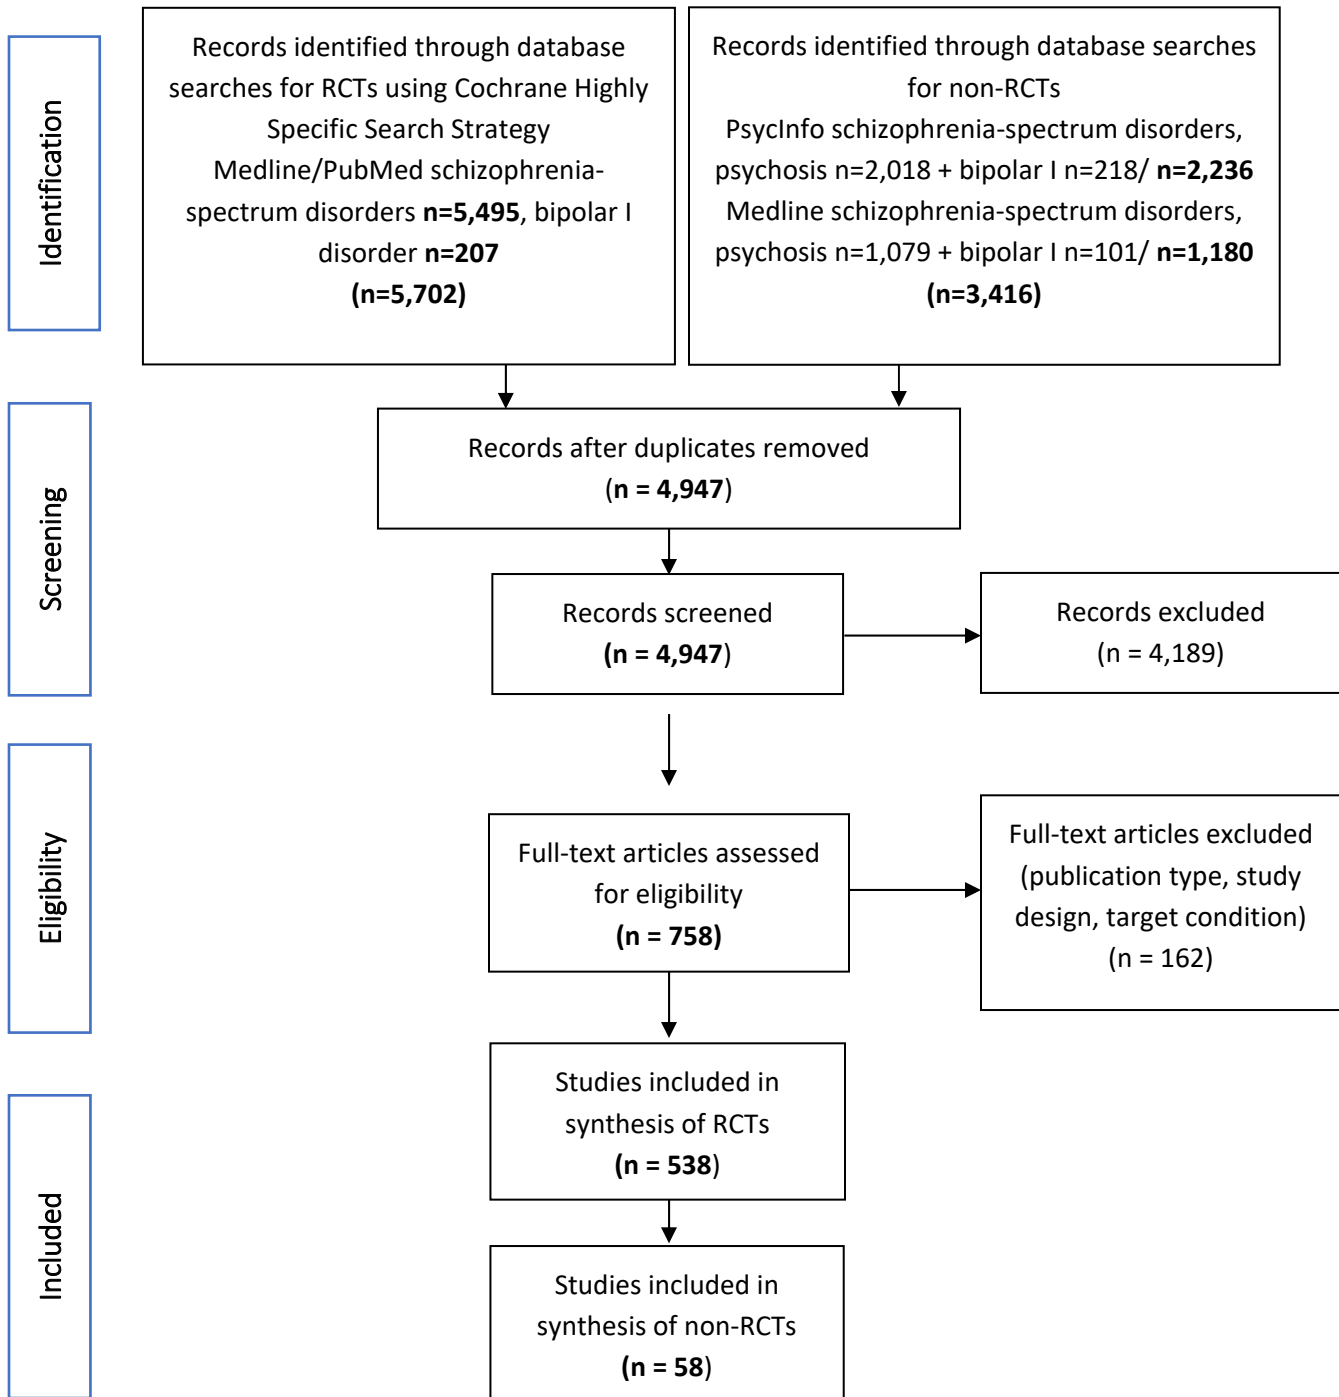

## Cochrane Highly Sensitive Search Strategy (CHSSS)

Database(s): Ovid MEDLINE(R) 1946 to January Week 3 2019

Search Strategy: Schizophrenia

26 Jan 2019

| #  | Searches                                                         | Results |
|----|------------------------------------------------------------------|---------|
| 1  | exp drug therapy/                                                | 1276398 |
| 2  | ((drug or pharma*) adj2 (therap* or medic*)).tw,kf.              | 86285   |
| 3  | exp Antipsychotic Agents/                                        | 116697  |
| 4  | antipsychotic*.tw,kf.                                            | 31402   |
| 5  | anti-psychotic.tw,kf.                                            | 582     |
| 6  | (antipsychotic* adj2 med*).tw,kf.                                | 5637    |
| 7  | neuroleptic*.tw,kf.                                              | 18442   |
| 8  | antidepressive agents/                                           | 40719   |
| 9  | antidepressant*.tw,kf.                                           | 53204   |
| 10 | "mood stabilizer".tw,kf.                                         | 1091    |
| 11 | exp psychotherapy/                                               | 183946  |
| 12 | psychotherap*.tw,kf.                                             | 39412   |
| 13 | (psycholog* adj2 treat*).tw,kf.                                  | 4445    |
| 14 | "psychological therapy".tw,kf.                                   | 743     |
| 15 | "psychosocial intervention*".tw,kf.                              | 3976    |
| 16 | exp family therapy/                                              | 8555    |
| 17 | (family adj2 (ther* or educ* or psycheduc* or interven*)).tw,kf. | 14262   |
| 18 | exp electroconvulsive therapy/                                   | 12617   |
| 19 | ECT.tw,kf.                                                       | 6732    |
| 20 | "electroconvulsive therapy".tw,kf.                               | 5920    |
| 21 | exp transcranial magnetic stimulation/                           | 10007   |
| 22 | TMS.tw,kf.                                                       | 8997    |
| 23 | "transcranial magnetic stimulation".tw,kf.                       | 11086   |
| 24 | social skill* train*.tw,kf.                                      | 805     |
| 25 | (social skill* adj2 train*).tw.                                  | 848     |
| 26 | life skill* train*.tw,kf.                                        | 123     |
| 27 | (life skill* adj2 train*).tw,kf.                                 | 128     |

|    |                                                 |         |
|----|-------------------------------------------------|---------|
| 28 | exp social support/                             | 65887   |
| 29 | social support.tw,kf.                           | 28934   |
| 30 | exp peer group/                                 | 18949   |
| 31 | peer group.tw,kf.                               | 1629    |
| 32 | peer support.tw,kf.                             | 2781    |
| 33 | exp employment, supported/                      | 1126    |
| 34 | (supp* adj2 empl*).tw,kf.                       | 2455    |
| 35 | (indiv* adj2 place* adj2 support*).tw,kf.       | 211     |
| 36 | psychoeducation.tw,kf.                          | 1913    |
| 37 | interpersonal therapy.tw,kf.                    | 262     |
| 38 | support* education.tw,kf.                       | 482     |
| 39 | "interpersonal and social rhythm*".tw,kf.       | 72      |
| 40 | "behavioral couples therap*".tw,kf.             | 55      |
| 41 | "behavioural couples therap*".tw,kf.            | 1       |
| 42 | Cognitive Remediation/                          | 174     |
| 43 | cognitive remediation.tw,kf.                    | 745     |
| 44 | (cognitive adj2 behavior* adj2 therap*).tw,kf.  | 8444    |
| 45 | (cognitive adj2 behaviour* adj2 therap*).tw,kf. | 4105    |
| 46 | or/1-45                                         | 1803291 |
| 47 | randomized controlled trial.pt.                 | 474725  |
| 48 | controlled clinical trial.pt.                   | 92861   |
| 49 | randomized.ab.                                  | 375543  |
| 50 | placebo.ab.                                     | 177023  |
| 51 | drug therapy.fs.                                | 2077443 |
| 52 | randomly.ab.                                    | 260597  |
| 53 | trial.ab.                                       | 389659  |
| 54 | groups.ab.                                      | 1621490 |
| 55 | 47 or 48 or 49 or 50 or 51 or 52 or 53 or 54    | 4021119 |
| 56 | exp animals/ not humans.sh.                     | 4538799 |
| 57 | 55 not 56                                       | 3431042 |
| 58 | exp ADULT/                                      | 6727504 |
| 59 | adult.tw,kf.                                    | 617683  |
| 60 | exp ADOLESCENT/                                 | 1907907 |

|    |                                                       |         |
|----|-------------------------------------------------------|---------|
| 61 | adolescen*.tw,kf.                                     | 231519  |
| 62 | teen*.tw,kf.                                          | 25160   |
| 63 | or/58-62                                              | 7642305 |
| 64 | exp CHILD/                                            | 1806389 |
| 65 | (child* or infant* or paediat* or pediat*).tw,kf.     | 1551146 |
| 66 | 64 or 65                                              | 2389093 |
| 67 | 63 not 66                                             | 6400260 |
| 68 | exp SCHIZOPHRENIA/                                    | 99544   |
| 69 | schizophrenia.tw,kf.                                  | 92885   |
| 70 | schizophrenic disorder*.tw,kf.                        | 968     |
| 71 | 68 or 69 or 70                                        | 121843  |
| 72 | 46 and 57 and 67 and 71                               | 18429   |
| 73 | limit 72 to (english language and yr="2013 -Current") | 3404    |

## Cochrane Highly Sensitive Search Strategy (CHSSS)

Ovid MEDLINE(R) 1946 to January Week 3 2019

Search Strategy: Psychotic Disorders

26 Jan 2019

| #  | Searches                                                         | Results |
|----|------------------------------------------------------------------|---------|
| 1  | exp drug therapy/                                                | 1276398 |
| 2  | ((drug or pharma*) adj2 (therap* or medic*)).tw,kf.              | 86285   |
| 3  | exp Antipsychotic Agents/                                        | 116697  |
| 4  | antipsychotic*.tw,kf.                                            | 31402   |
| 5  | anti-psychotic.tw,kf.                                            | 582     |
| 6  | (antipsychotic* adj2 med*).tw,kf.                                | 5637    |
| 7  | neuroleptic*.tw,kf.                                              | 18442   |
| 8  | antidepressive agents/                                           | 40719   |
| 9  | antidepressant*.tw,kf.                                           | 53204   |
| 10 | "mood stabilizer".tw,kf.                                         | 1091    |
| 11 | exp psychotherapy/                                               | 183946  |
| 12 | psychotherap*.tw,kf.                                             | 39412   |
| 13 | (psycholog* adj2 treat*).tw,kf.                                  | 4445    |
| 14 | "psychological therapy".tw,kf.                                   | 743     |
| 15 | "psychosocial intervention*".tw,kf.                              | 3976    |
| 16 | exp family therapy/                                              | 8555    |
| 17 | (family adj2 (ther* or educ* or psycheduc* or interven*)).tw,kf. | 14262   |
| 18 | exp electroconvulsive therapy/                                   | 12617   |
| 19 | ECT.tw,kf.                                                       | 6732    |
| 20 | "electroconvulsive therapy".tw,kf.                               | 5920    |
| 21 | exp transcranial magnetic stimulation/                           | 10007   |
| 22 | TMS.tw,kf.                                                       | 8997    |
| 23 | "transcranial magnetic stimulation".tw,kf.                       | 11086   |
| 24 | social skill* train*.tw,kf.                                      | 805     |
| 25 | (social skill* adj2 train*).tw.                                  | 848     |
| 26 | life skill* train*.tw,kf.                                        | 123     |
| 27 | (life skill* adj2 train*).tw,kf.                                 | 128     |

|    |                                                 |         |
|----|-------------------------------------------------|---------|
| 28 | exp social support/                             | 65887   |
| 29 | social support.tw,kf.                           | 28934   |
| 30 | exp peer group/                                 | 18949   |
| 31 | peer group.tw,kf.                               | 1629    |
| 32 | peer support.tw,kf.                             | 2781    |
| 33 | exp employment, supported/                      | 1126    |
| 34 | (supp* adj2 empl*).tw,kf.                       | 2455    |
| 35 | (indiv* adj2 place* adj2 support*).tw,kf.       | 211     |
| 36 | psychoeducation.tw,kf.                          | 1913    |
| 37 | interpersonal therapy.tw,kf.                    | 262     |
| 38 | support* education.tw,kf.                       | 482     |
| 39 | "interpersonal and social rhythm*".tw,kf.       | 72      |
| 40 | "behavioral couples therap*".tw,kf.             | 55      |
| 41 | "behavioural couples therap*".tw,kf.            | 1       |
| 42 | Cognitive Remediation/                          | 174     |
| 43 | cognitive remediation.tw,kf.                    | 745     |
| 44 | (cognitive adj2 behavior* adj2 therap*).tw,kf.  | 8444    |
| 45 | (cognitive adj2 behaviour* adj2 therap*).tw,kf. | 4105    |
| 46 | or/1-45                                         | 1803291 |
| 47 | randomized controlled trial.pt.                 | 474725  |
| 48 | controlled clinical trial.pt.                   | 92861   |
| 49 | randomized.ab.                                  | 375543  |
| 50 | placebo.ab.                                     | 177023  |
| 51 | drug therapy.fs.                                | 2077443 |
| 52 | randomly.ab.                                    | 260597  |
| 53 | trial.ab.                                       | 389659  |
| 54 | groups.ab.                                      | 1621490 |
| 55 | 47 or 48 or 49 or 50 or 51 or 52 or 53 or 54    | 4021119 |
| 56 | exp animals/ not humans.sh.                     | 4538799 |
| 57 | 55 not 56                                       | 3431042 |
| 58 | exp ADULT/                                      | 6727504 |
| 59 | adult.tw,kf.                                    | 617683  |
| 60 | exp ADOLESCENT/                                 | 1907907 |

|    |                                                       |         |
|----|-------------------------------------------------------|---------|
| 61 | adolescen*.tw,kf.                                     | 231519  |
| 62 | teen*.tw,kf.                                          | 25160   |
| 63 | or/58-62                                              | 7642305 |
| 64 | exp CHILD/                                            | 1806389 |
| 65 | (child* or infant* or paediat* or pediat*).tw,kf.     | 1551146 |
| 66 | 64 or 65                                              | 2389093 |
| 67 | 63 not 66                                             | 6400260 |
| 68 | exp Psychotic Disorders/                              | 49074   |
| 69 | (psychotic adj2 disorder*).tw,kf.                     | 7450    |
| 70 | psychotic disorder.tw,kf.                             | 2278    |
| 71 | psychosis.tw,kf.                                      | 29608   |
| 72 | psychoses.tw,kf.                                      | 14130   |
| 73 | or/68-72                                              | 67567   |
| 74 | 46 and 57 and 67 and 73                               | 8143    |
| 75 | limit 74 to (english language and yr="2013 -Current") | 1657    |

## Cochrane Highly Sensitive Search Strategy (CHSSS)

Ovid MEDLINE(R) 1946 to January Week 3 2019

Search Strategy: Schizoaffective Disorder

26 Jan 2019

| #  | Searches                                                         | Results |
|----|------------------------------------------------------------------|---------|
| 1  | exp drug therapy/                                                | 1276398 |
| 2  | ((drug or pharma*) adj2 (therap* or medic*)).tw,kf.              | 86285   |
| 3  | exp Antipsychotic Agents/                                        | 116697  |
| 4  | antipsychotic*.tw,kf.                                            | 31402   |
| 5  | anti-psychotic.tw,kf.                                            | 582     |
| 6  | (antipsychotic* adj2 med*).tw,kf.                                | 5637    |
| 7  | neuroleptic*.tw,kf.                                              | 18442   |
| 8  | antidepressive agents/                                           | 40719   |
| 9  | antidepressant*.tw,kf.                                           | 53204   |
| 10 | "mood stabilizer".tw,kf.                                         | 1091    |
| 11 | exp psychotherapy/                                               | 183946  |
| 12 | psychotherap*.tw,kf.                                             | 39412   |
| 13 | (psycholog* adj2 treat*).tw,kf.                                  | 4445    |
| 14 | "psychological therapy".tw,kf.                                   | 743     |
| 15 | "psychosocial intervention*".tw,kf.                              | 3976    |
| 16 | exp family therapy/                                              | 8555    |
| 17 | (family adj2 (ther* or educ* or psycheduc* or interven*)).tw,kf. | 14262   |
| 18 | exp electroconvulsive therapy/                                   | 12617   |
| 19 | ECT.tw,kf.                                                       | 6732    |
| 20 | "electroconvulsive therapy".tw,kf.                               | 5920    |
| 21 | exp transcranial magnetic stimulation/                           | 10007   |
| 22 | TMS.tw,kf.                                                       | 8997    |
| 23 | "transcranial magnetic stimulation".tw,kf.                       | 11086   |
| 24 | social skill* train*.tw,kf.                                      | 805     |
| 25 | (social skill* adj2 train*).tw.                                  | 848     |
| 26 | life skill* train*.tw,kf.                                        | 123     |
| 27 | (life skill* adj2 train*).tw,kf.                                 | 128     |



|    |                                                 |         |
|----|-------------------------------------------------|---------|
| 28 | exp social support/                             | 65887   |
| 29 | social support.tw,kf.                           | 28934   |
| 30 | exp peer group/                                 | 18949   |
| 31 | peer group.tw,kf.                               | 1629    |
| 32 | peer support.tw,kf.                             | 2781    |
| 33 | exp employment, supported/                      | 1126    |
| 34 | (supp* adj2 empl*).tw,kf.                       | 2455    |
| 35 | (indiv* adj2 place* adj2 support*).tw,kf.       | 211     |
| 36 | psychoeducation.tw,kf.                          | 1913    |
| 37 | interpersonal therapy.tw,kf.                    | 262     |
| 38 | support* education.tw,kf.                       | 482     |
| 39 | "interpersonal and social rhythm*".tw,kf.       | 72      |
| 40 | "behavioral couples therap*".tw,kf.             | 55      |
| 41 | "behavioural couples therap*".tw,kf.            | 1       |
| 42 | Cognitive Remediation/                          | 174     |
| 43 | cognitive remediation.tw,kf.                    | 745     |
| 44 | (cognitive adj2 behavior* adj2 therap*).tw,kf.  | 8444    |
| 45 | (cognitive adj2 behaviour* adj2 therap*).tw,kf. | 4105    |
| 46 | or/1-45                                         | 1803291 |
| 47 | randomized controlled trial.pt.                 | 474725  |
| 48 | controlled clinical trial.pt.                   | 92861   |
| 49 | randomized.ab.                                  | 375543  |
| 50 | placebo.ab.                                     | 177023  |
| 51 | drug therapy.fs.                                | 2077443 |
| 52 | randomly.ab.                                    | 260597  |
| 53 | trial.ab.                                       | 389659  |
| 54 | groups.ab.                                      | 1621490 |
| 55 | 47 or 48 or 49 or 50 or 51 or 52 or 53 or 54    | 4021119 |
| 56 | exp animals/ not humans.sh.                     | 4538799 |
| 57 | 55 not 56                                       | 3431042 |
| 58 | exp ADULT/                                      | 6727504 |
| 59 | adult.tw,kf.                                    | 617683  |
| 60 | exp ADOLESCENT/                                 | 1907907 |

|    |                                                       |         |
|----|-------------------------------------------------------|---------|
| 61 | adolescen*.tw,kf.                                     | 231519  |
| 62 | teen*.tw,kf.                                          | 25160   |
| 63 | or/58-62                                              | 7642305 |
| 64 | exp CHILD/                                            | 1806389 |
| 65 | (child* or infant* or paediat* or pediat*).tw,kf.     | 1551146 |
| 66 | 64 or 65                                              | 2389093 |
| 67 | 63 not 66                                             | 6400260 |
| 68 | schizoaffective disorder.tw,kf.                       | 3566    |
| 69 | schizoaffective.tw,kf.                                | 4783    |
| 70 | 68 or 69                                              | 4783    |
| 71 | 46 and 57 and 67 and 70                               | 1469    |
| 72 | limit 71 to (english language and yr="2013 -Current") | 302     |

## Cochrane Highly Sensitive Search Strategy (CHSSS)

Ovid MEDLINE(R) 1946 to January Week 3 2019

Search Strategy: Schizotypal disorder or schizotypal personality disorder

26 Jan 2019

| #  | Searches                                                         | Results |
|----|------------------------------------------------------------------|---------|
| 1  | exp drug therapy/                                                | 1276398 |
| 2  | ((drug or pharma*) adj2 (therap* or medic*)).tw,kf.              | 86285   |
| 3  | exp Antipsychotic Agents/                                        | 116697  |
| 4  | antipsychotic*.tw,kf.                                            | 31402   |
| 5  | anti-psychotic.tw,kf.                                            | 582     |
| 6  | (antipsychotic* adj2 med*).tw,kf.                                | 5637    |
| 7  | neuroleptic*.tw,kf.                                              | 18442   |
| 8  | antidepressive agents/                                           | 40719   |
| 9  | antidepressant*.tw,kf.                                           | 53204   |
| 10 | "mood stabilizer".tw,kf.                                         | 1091    |
| 11 | exp psychotherapy/                                               | 183946  |
| 12 | psychotherap*.tw,kf.                                             | 39412   |
| 13 | (psycholog* adj2 treat*).tw,kf.                                  | 4445    |
| 14 | "psychological therapy".tw,kf.                                   | 743     |
| 15 | "psychosocial intervention*".tw,kf.                              | 3976    |
| 16 | exp family therapy/                                              | 8555    |
| 17 | (family adj2 (ther* or educ* or psycheduc* or interven*)).tw,kf. | 14262   |
| 18 | exp electroconvulsive therapy/                                   | 12617   |
| 19 | ECT.tw,kf.                                                       | 6732    |
| 20 | "electroconvulsive therapy".tw,kf.                               | 5920    |
| 21 | exp transcranial magnetic stimulation/                           | 10007   |
| 22 | TMS.tw,kf.                                                       | 8997    |
| 23 | "transcranial magnetic stimulation".tw,kf.                       | 11086   |
| 24 | social skill* train*.tw,kf.                                      | 805     |
| 25 | (social skill* adj2 train*).tw.                                  | 848     |
| 26 | life skill* train*.tw,kf.                                        | 123     |
| 27 | (life skill* adj2 train*).tw,kf.                                 | 128     |

|    |                                                 |         |
|----|-------------------------------------------------|---------|
| 28 | exp social support/                             | 65887   |
| 29 | social support.tw,kf.                           | 28934   |
| 30 | exp peer group/                                 | 18949   |
| 31 | peer group.tw,kf.                               | 1629    |
| 32 | peer support.tw,kf.                             | 2781    |
| 33 | exp employment, supported/                      | 1126    |
| 34 | (supp* adj2 empl*).tw,kf.                       | 2455    |
| 35 | (indiv* adj2 place* adj2 support*).tw,kf.       | 211     |
| 36 | psychoeducation.tw,kf.                          | 1913    |
| 37 | interpersonal therapy.tw,kf.                    | 262     |
| 38 | support* education.tw,kf.                       | 482     |
| 39 | "interpersonal and social rhythm*".tw,kf.       | 72      |
| 40 | "behavioral couples therap*".tw,kf.             | 55      |
| 41 | "behavioural couples therap*".tw,kf.            | 1       |
| 42 | Cognitive Remediation/                          | 174     |
| 43 | cognitive remediation.tw,kf.                    | 745     |
| 44 | (cognitive adj2 behavior* adj2 therap*).tw,kf.  | 8444    |
| 45 | (cognitive adj2 behaviour* adj2 therap*).tw,kf. | 4105    |
| 46 | or/1-45                                         | 1803291 |
| 47 | randomized controlled trial.pt.                 | 474725  |
| 48 | controlled clinical trial.pt.                   | 92861   |
| 49 | randomized.ab.                                  | 375543  |
| 50 | placebo.ab.                                     | 177023  |
| 51 | drug therapy.fs.                                | 2077443 |
| 52 | randomly.ab.                                    | 260597  |
| 53 | trial.ab.                                       | 389659  |
| 54 | groups.ab.                                      | 1621490 |
| 55 | 47 or 48 or 49 or 50 or 51 or 52 or 53 or 54    | 4021119 |
| 56 | exp animals/ not humans.sh.                     | 4538799 |
| 57 | 55 not 56                                       | 3431042 |
| 58 | exp ADULT/                                      | 6727504 |
| 59 | adult.tw,kf.                                    | 617683  |
| 60 | exp ADOLESCENT/                                 | 1907907 |

|    |                                                                     |         |
|----|---------------------------------------------------------------------|---------|
| 61 | adolescen*.tw,kf.                                                   | 231519  |
| 62 | teen*.tw,kf.                                                        | 25160   |
| 63 | or/58-62                                                            | 7642305 |
| 64 | exp CHILD/                                                          | 1806389 |
| 65 | (child* or infant* or paediat* or pediat*).tw,kf.                   | 1551146 |
| 66 | 64 or 65                                                            | 2389093 |
| 67 | 63 not 66                                                           | 6400260 |
| 68 | (schizotypal disorder* or schizotypal personality disorder*).tw,kf. | 708     |
| 69 | 46 and 57 and 67 and 68                                             | 47      |
| 70 | limit 69 to (english language and yr="2013 -Current")               | 5       |

## Cochrane Highly Sensitive Search Strategy (CHSSS)

Ovid MEDLINE(R) 1946 to January Week 3 2019

Search Strategy: Schizophreniform disorder

26 Jan 2019

| #  | Searches                                                         | Results |
|----|------------------------------------------------------------------|---------|
| 1  | exp drug therapy/                                                | 1276398 |
| 2  | ((drug or pharma*) adj2 (therap* or medic*)).tw,kf.              | 86285   |
| 3  | exp Antipsychotic Agents/                                        | 116697  |
| 4  | antipsychotic*.tw,kf.                                            | 31402   |
| 5  | anti-psychotic.tw,kf.                                            | 582     |
| 6  | (antipsychotic* adj2 med*).tw,kf.                                | 5637    |
| 7  | neuroleptic*.tw,kf.                                              | 18442   |
| 8  | antidepressive agents/                                           | 40719   |
| 9  | antidepressant*.tw,kf.                                           | 53204   |
| 10 | "mood stabilizer".tw,kf.                                         | 1091    |
| 11 | exp psychotherapy/                                               | 183946  |
| 12 | psychotherap*.tw,kf.                                             | 39412   |
| 13 | (psycholog* adj2 treat*).tw,kf.                                  | 4445    |
| 14 | "psychological therapy".tw,kf.                                   | 743     |
| 15 | "psychosocial intervention*".tw,kf.                              | 3976    |
| 16 | exp family therapy/                                              | 8555    |
| 17 | (family adj2 (ther* or educ* or psycheduc* or interven*)).tw,kf. | 14262   |
| 18 | exp electroconvulsive therapy/                                   | 12617   |
| 19 | ECT.tw,kf.                                                       | 6732    |
| 20 | "electroconvulsive therapy".tw,kf.                               | 5920    |
| 21 | exp transcranial magnetic stimulation/                           | 10007   |
| 22 | TMS.tw,kf.                                                       | 8997    |
| 23 | "transcranial magnetic stimulation".tw,kf.                       | 11086   |
| 24 | social skill* train*.tw,kf.                                      | 805     |
| 25 | (social skill* adj2 train*).tw.                                  | 848     |
| 26 | life skill* train*.tw,kf.                                        | 123     |
| 27 | (life skill* adj2 train*).tw,kf.                                 | 128     |

|    |                                                 |         |
|----|-------------------------------------------------|---------|
| 28 | exp social support/                             | 65887   |
| 29 | social support.tw,kf.                           | 28934   |
| 30 | exp peer group/                                 | 18949   |
| 31 | peer group.tw,kf.                               | 1629    |
| 32 | peer support.tw,kf.                             | 2781    |
| 33 | exp employment, supported/                      | 1126    |
| 34 | (supp* adj2 empl*).tw,kf.                       | 2455    |
| 35 | (indiv* adj2 place* adj2 support*).tw,kf.       | 211     |
| 36 | psychoeducation.tw,kf.                          | 1913    |
| 37 | interpersonal therapy.tw,kf.                    | 262     |
| 38 | support* education.tw,kf.                       | 482     |
| 39 | "interpersonal and social rhythm*".tw,kf.       | 72      |
| 40 | "behavioral couples therap*".tw,kf.             | 55      |
| 41 | "behavioural couples therap*".tw,kf.            | 1       |
| 42 | Cognitive Remediation/                          | 174     |
| 43 | cognitive remediation.tw,kf.                    | 745     |
| 44 | (cognitive adj2 behavior* adj2 therap*).tw,kf.  | 8444    |
| 45 | (cognitive adj2 behaviour* adj2 therap*).tw,kf. | 4105    |
| 46 | or/1-45                                         | 1803291 |
| 47 | randomized controlled trial.pt.                 | 474725  |
| 48 | controlled clinical trial.pt.                   | 92861   |
| 49 | randomized.ab.                                  | 375543  |
| 50 | placebo.ab.                                     | 177023  |
| 51 | drug therapy.fs.                                | 2077443 |
| 52 | randomly.ab.                                    | 260597  |
| 53 | trial.ab.                                       | 389659  |
| 54 | groups.ab.                                      | 1621490 |
| 55 | 47 or 48 or 49 or 50 or 51 or 52 or 53 or 54    | 4021119 |
| 56 | exp animals/ not humans.sh.                     | 4538799 |
| 57 | 55 not 56                                       | 3431042 |
| 58 | exp ADULT/                                      | 6727504 |
| 59 | adult.tw,kf.                                    | 617683  |
| 60 | exp ADOLESCENT/                                 | 1907907 |

|    |                                                       |         |
|----|-------------------------------------------------------|---------|
| 61 | adolescen*.tw,kf.                                     | 231519  |
| 62 | teen*.tw,kf.                                          | 25160   |
| 63 | or/58-62                                              | 7642305 |
| 64 | exp CHILD/                                            | 1806389 |
| 65 | (child* or infant* or paediat* or pediat*).tw,kf.     | 1551146 |
| 66 | 64 or 65                                              | 2389093 |
| 67 | 63 not 66                                             | 6400260 |
| 68 | (schizophreniform adj2 disorder*).tw,kf.              | 530     |
| 69 | schizophreniform disorder.mp.                         | 458     |
| 70 | schizophreniform.tw,kf.                               | 956     |
| 71 | 68 or 69 or 70                                        | 956     |
| 72 | 46 and 57 and 67 and 71                               | 235     |
| 73 | limit 72 to (english language and yr="2013 -Current") | 18      |



## Cochrane Highly Sensitive Search Strategy (CHSSS)

Ovid MEDLINE(R) 1946 to January Week 3 2019

Search Strategy: Delusional disorder

26 Jan 2019

| #  | Searches                                                         | Results |
|----|------------------------------------------------------------------|---------|
| 1  | exp drug therapy/                                                | 1276398 |
| 2  | ((drug or pharma*) adj2 (therap* or medic*)).tw,kf.              | 86285   |
| 3  | exp Antipsychotic Agents/                                        | 116697  |
| 4  | antipsychotic*.tw,kf.                                            | 31402   |
| 5  | anti-psychotic.tw,kf.                                            | 582     |
| 6  | (antipsychotic* adj2 med*).tw,kf.                                | 5637    |
| 7  | neuroleptic*.tw,kf.                                              | 18442   |
| 8  | antidepressive agents/                                           | 40719   |
| 9  | antidepressant*.tw,kf.                                           | 53204   |
| 10 | "mood stabilizer".tw,kf.                                         | 1091    |
| 11 | exp psychotherapy/                                               | 183946  |
| 12 | psychotherap*.tw,kf.                                             | 39412   |
| 13 | (psycholog* adj2 treat*).tw,kf.                                  | 4445    |
| 14 | "psychological therapy".tw,kf.                                   | 743     |
| 15 | "psychosocial intervention*".tw,kf.                              | 3976    |
| 16 | exp family therapy/                                              | 8555    |
| 17 | (family adj2 (ther* or educ* or psycheduc* or interven*)).tw,kf. | 14262   |
| 18 | exp electroconvulsive therapy/                                   | 12617   |
| 19 | ECT.tw,kf.                                                       | 6732    |
| 20 | "electroconvulsive therapy".tw,kf.                               | 5920    |
| 21 | exp transcranial magnetic stimulation/                           | 10007   |
| 22 | TMS.tw,kf.                                                       | 8997    |
| 23 | "transcranial magnetic stimulation".tw,kf.                       | 11086   |
| 24 | social skill* train*.tw,kf.                                      | 805     |
| 25 | (social skill* adj2 train*).tw.                                  | 848     |
| 26 | life skill* train*.tw,kf.                                        | 123     |
| 27 | (life skill* adj2 train*).tw,kf.                                 | 128     |

|    |                                                 |         |
|----|-------------------------------------------------|---------|
| 28 | exp social support/                             | 65887   |
| 29 | social support.tw,kf.                           | 28934   |
| 30 | exp peer group/                                 | 18949   |
| 31 | peer group.tw,kf.                               | 1629    |
| 32 | peer support.tw,kf.                             | 2781    |
| 33 | exp employment, supported/                      | 1126    |
| 34 | (supp* adj2 empl*).tw,kf.                       | 2455    |
| 35 | (indiv* adj2 place* adj2 support*).tw,kf.       | 211     |
| 36 | psychoeducation.tw,kf.                          | 1913    |
| 37 | interpersonal therapy.tw,kf.                    | 262     |
| 38 | support* education.tw,kf.                       | 482     |
| 39 | "interpersonal and social rhythm*".tw,kf.       | 72      |
| 40 | "behavioral couples therap*".tw,kf.             | 55      |
| 41 | "behavioural couples therap*".tw,kf.            | 1       |
| 42 | Cognitive Remediation/                          | 174     |
| 43 | cognitive remediation.tw,kf.                    | 745     |
| 44 | (cognitive adj2 behavior* adj2 therap*).tw,kf.  | 8444    |
| 45 | (cognitive adj2 behaviour* adj2 therap*).tw,kf. | 4105    |
| 46 | or/1-45                                         | 1803291 |
| 47 | randomized controlled trial.pt.                 | 474725  |
| 48 | controlled clinical trial.pt.                   | 92861   |
| 49 | randomized.ab.                                  | 375543  |
| 50 | placebo.ab.                                     | 177023  |
| 51 | drug therapy.fs.                                | 2077443 |
| 52 | randomly.ab.                                    | 260597  |
| 53 | trial.ab.                                       | 389659  |
| 54 | groups.ab.                                      | 1621490 |
| 55 | 47 or 48 or 49 or 50 or 51 or 52 or 53 or 54    | 4021119 |
| 56 | exp animals/ not humans.sh.                     | 4538799 |
| 57 | 55 not 56                                       | 3431042 |
| 58 | exp ADULT/                                      | 6727504 |
| 59 | adult.tw,kf.                                    | 617683  |
| 60 | exp ADOLESCENT/                                 | 1907907 |

|    |                                                       |         |
|----|-------------------------------------------------------|---------|
| 61 | adolescen*.tw,kf.                                     | 231519  |
| 62 | teen*.tw,kf.                                          | 25160   |
| 63 | or/58-62                                              | 7642305 |
| 64 | exp CHILD/                                            | 1806389 |
| 65 | (child* or infant* or paediat* or pediat*).tw,kf.     | 1551146 |
| 66 | 64 or 65                                              | 2389093 |
| 67 | 63 not 66                                             | 6400260 |
| 68 | delusional disorder.mp.                               | 560     |
| 69 | (delusion* adj2 disorder*).tw,kf.                     | 950     |
| 70 | 68 or 69                                              | 950     |
| 71 | 46 and 57 and 67 and 70                               | 165     |
| 72 | limit 71 to (english language and yr="2013 -Current") | 28      |

## Cochrane Highly Sensitive Search Strategy (CHSSS)

Ovid MEDLINE(R) 1946 to January Week 3 2019

Search Strategy: Brief psychotic disorder and Acute and transient psychotic disorder  
26 Jan 2019

| #  | Searches                                                         | Results |
|----|------------------------------------------------------------------|---------|
| 1  | exp drug therapy/                                                | 1276398 |
| 2  | ((drug or pharma*) adj2 (therap* or medic*)).tw,kf.              | 86285   |
| 3  | exp Antipsychotic Agents/                                        | 116697  |
| 4  | antipsychotic*.tw,kf.                                            | 31402   |
| 5  | anti-psychotic.tw,kf.                                            | 582     |
| 6  | (antipsychotic* adj2 med*).tw,kf.                                | 5637    |
| 7  | neuroleptic*.tw,kf.                                              | 18442   |
| 8  | antidepressive agents/                                           | 40719   |
| 9  | antidepressant*.tw,kf.                                           | 53204   |
| 10 | "mood stabilizer".tw,kf.                                         | 1091    |
| 11 | exp psychotherapy/                                               | 183946  |
| 12 | psychotherap*.tw,kf.                                             | 39412   |
| 13 | (psycholog* adj2 treat*).tw,kf.                                  | 4445    |
| 14 | "psychological therapy".tw,kf.                                   | 743     |
| 15 | "psychosocial intervention*".tw,kf.                              | 3976    |
| 16 | exp family therapy/                                              | 8555    |
| 17 | (family adj2 (ther* or educ* or psycheduc* or interven*)).tw,kf. | 14262   |
| 18 | exp electroconvulsive therapy/                                   | 12617   |
| 19 | ECT.tw,kf.                                                       | 6732    |
| 20 | "electroconvulsive therapy".tw,kf.                               | 5920    |
| 21 | exp transcranial magnetic stimulation/                           | 10007   |
| 22 | TMS.tw,kf.                                                       | 8997    |
| 23 | "transcranial magnetic stimulation".tw,kf.                       | 11086   |
| 24 | social skill* train*.tw,kf.                                      | 805     |
| 25 | (social skill* adj2 train*).tw.                                  | 848     |
| 26 | life skill* train*.tw,kf.                                        | 123     |
| 27 | (life skill* adj2 train*).tw,kf.                                 | 128     |

|    |                                                 |         |
|----|-------------------------------------------------|---------|
| 28 | exp social support/                             | 65887   |
| 29 | social support.tw,kf.                           | 28934   |
| 30 | exp peer group/                                 | 18949   |
| 31 | peer group.tw,kf.                               | 1629    |
| 32 | peer support.tw,kf.                             | 2781    |
| 33 | exp employment, supported/                      | 1126    |
| 34 | (supp* adj2 empl*).tw,kf.                       | 2455    |
| 35 | (indiv* adj2 place* adj2 support*).tw,kf.       | 211     |
| 36 | psychoeducation.tw,kf.                          | 1913    |
| 37 | interpersonal therapy.tw,kf.                    | 262     |
| 38 | support* education.tw,kf.                       | 482     |
| 39 | "interpersonal and social rhythm*".tw,kf.       | 72      |
| 40 | "behavioral couples therap*".tw,kf.             | 55      |
| 41 | "behavioural couples therap*".tw,kf.            | 1       |
| 42 | Cognitive Remediation/                          | 174     |
| 43 | cognitive remediation.tw,kf.                    | 745     |
| 44 | (cognitive adj2 behavior* adj2 therap*).tw,kf.  | 8444    |
| 45 | (cognitive adj2 behaviour* adj2 therap*).tw,kf. | 4105    |
| 46 | or/1-45                                         | 1803291 |
| 47 | randomized controlled trial.pt.                 | 474725  |
| 48 | controlled clinical trial.pt.                   | 92861   |
| 49 | randomized.ab.                                  | 375543  |
| 50 | placebo.ab.                                     | 177023  |
| 51 | drug therapy.fs.                                | 2077443 |
| 52 | randomly.ab.                                    | 260597  |
| 53 | trial.ab.                                       | 389659  |
| 54 | groups.ab.                                      | 1621490 |
| 55 | 47 or 48 or 49 or 50 or 51 or 52 or 53 or 54    | 4021119 |
| 56 | exp animals/ not humans.sh.                     | 4538799 |
| 57 | 55 not 56                                       | 3431042 |
| 58 | exp ADULT/                                      | 6727504 |
| 59 | adult.tw,kf.                                    | 617683  |
| 60 | exp ADOLESCENT/                                 | 1907907 |

|    |                                                       |         |
|----|-------------------------------------------------------|---------|
| 61 | adolescen*.tw,kf.                                     | 231519  |
| 62 | teen*.tw,kf.                                          | 25160   |
| 63 | or/58-62                                              | 7642305 |
| 64 | exp CHILD/                                            | 1806389 |
| 65 | (child* or infant* or paediat* or pediat*).tw,kf.     | 1551146 |
| 66 | 64 or 65                                              | 2389093 |
| 67 | 63 not 66                                             | 6400260 |
| 68 | brief psychotic disorder*.tw,kf.                      | 96      |
| 69 | "acute and transient psychotic disorder*".tw,kf.      | 102     |
| 70 | 68 or 69                                              | 185     |
| 71 | 46 and 57 and 67 and 70                               | 17      |
| 72 | limit 71 to (english language and yr="2013 -Current") | 3       |

## Cochrane Highly Sensitive Search Strategy (CHSSS)

Ovid MEDLINE(R) 1946 to January Week 3 2019

Search Strategy: Catatonia and Unspecified catatonia

26 Jan 2019

| #  | Searches                                                         | Results |
|----|------------------------------------------------------------------|---------|
| 1  | exp drug therapy/                                                | 1276398 |
| 2  | ((drug or pharma*) adj2 (therap* or medic*)).tw,kf.              | 86285   |
| 3  | exp Antipsychotic Agents/                                        | 116697  |
| 4  | antipsychotic*.tw,kf.                                            | 31402   |
| 5  | anti-psychotic.tw,kf.                                            | 582     |
| 6  | (antipsychotic* adj2 med*).tw,kf.                                | 5637    |
| 7  | neuroleptic*.tw,kf.                                              | 18442   |
| 8  | antidepressive agents/                                           | 40719   |
| 9  | antidepressant*.tw,kf.                                           | 53204   |
| 10 | "mood stabilizer".tw,kf.                                         | 1091    |
| 11 | exp psychotherapy/                                               | 183946  |
| 12 | psychotherap*.tw,kf.                                             | 39412   |
| 13 | (psycholog* adj2 treat*).tw,kf.                                  | 4445    |
| 14 | "psychological therapy".tw,kf.                                   | 743     |
| 15 | "psychosocial intervention*".tw,kf.                              | 3976    |
| 16 | exp family therapy/                                              | 8555    |
| 17 | (family adj2 (ther* or educ* or psycheduc* or interven*)).tw,kf. | 14262   |
| 18 | exp electroconvulsive therapy/                                   | 12617   |
| 19 | ECT.tw,kf.                                                       | 6732    |
| 20 | "electroconvulsive therapy".tw,kf.                               | 5920    |
| 21 | exp transcranial magnetic stimulation/                           | 10007   |
| 22 | TMS.tw,kf.                                                       | 8997    |
| 23 | "transcranial magnetic stimulation".tw,kf.                       | 11086   |
| 24 | social skill* train*.tw,kf.                                      | 805     |
| 25 | (social skill* adj2 train*).tw.                                  | 848     |
| 26 | life skill* train*.tw,kf.                                        | 123     |
| 27 | (life skill* adj2 train*).tw,kf.                                 | 128     |

|    |                                                 |         |
|----|-------------------------------------------------|---------|
| 28 | exp social support/                             | 65887   |
| 29 | social support.tw,kf.                           | 28934   |
| 30 | exp peer group/                                 | 18949   |
| 31 | peer group.tw,kf.                               | 1629    |
| 32 | peer support.tw,kf.                             | 2781    |
| 33 | exp employment, supported/                      | 1126    |
| 34 | (supp* adj2 empl*).tw,kf.                       | 2455    |
| 35 | (indiv* adj2 place* adj2 support*).tw,kf.       | 211     |
| 36 | psychoeducation.tw,kf.                          | 1913    |
| 37 | interpersonal therapy.tw,kf.                    | 262     |
| 38 | support* education.tw,kf.                       | 482     |
| 39 | "interpersonal and social rhythm*".tw,kf.       | 72      |
| 40 | "behavioral couples therap*".tw,kf.             | 55      |
| 41 | "behavioural couples therap*".tw,kf.            | 1       |
| 42 | Cognitive Remediation/                          | 174     |
| 43 | cognitive remediation.tw,kf.                    | 745     |
| 44 | (cognitive adj2 behavior* adj2 therap*).tw,kf.  | 8444    |
| 45 | (cognitive adj2 behaviour* adj2 therap*).tw,kf. | 4105    |
| 46 | or/1-45                                         | 1803291 |
| 47 | randomized controlled trial.pt.                 | 474725  |
| 48 | controlled clinical trial.pt.                   | 92861   |
| 49 | randomized.ab.                                  | 375543  |
| 50 | placebo.ab.                                     | 177023  |
| 51 | drug therapy.fs.                                | 2077443 |
| 52 | randomly.ab.                                    | 260597  |
| 53 | trial.ab.                                       | 389659  |
| 54 | groups.ab.                                      | 1621490 |
| 55 | 47 or 48 or 49 or 50 or 51 or 52 or 53 or 54    | 4021119 |
| 56 | exp animals/ not humans.sh.                     | 4538799 |
| 57 | 55 not 56                                       | 3431042 |
| 58 | exp ADULT/                                      | 6727504 |
| 59 | adult.tw,kf.                                    | 617683  |
| 60 | exp ADOLESCENT/                                 | 1907907 |



|    |                                                       |         |
|----|-------------------------------------------------------|---------|
| 61 | adolescen*.tw,kf.                                     | 231519  |
| 62 | teen*.tw,kf.                                          | 25160   |
| 63 | or/58-62                                              | 7642305 |
| 64 | exp CHILD/                                            | 1806389 |
| 65 | (child* or infant* or paediat* or pediat*).tw,kf.     | 1551146 |
| 66 | 64 or 65                                              | 2389093 |
| 67 | 63 not 66                                             | 6400260 |
| 68 | exp CATATONIA/                                        | 2350    |
| 69 | cataton*.tw,kf.                                       | 2739    |
| 70 | unspecified catatonia.tw,kf.                          | 0       |
| 71 | 68 or 69 or 70                                        | 3308    |
| 72 | 46 and 57 and 67 and 71                               | 471     |
| 73 | limit 72 to (english language and yr="2013 -Current") | 71      |

## Cochrane Highly Sensitive Search Strategy (CHSSS)

Ovid MEDLINE(R) 1946 to January Week 3 2019

Search Strategy: Substance- and/or Medication-induced psychotic disorders

26 Jan 2019

| #  | Searches                                                         | Results |
|----|------------------------------------------------------------------|---------|
| 1  | exp drug therapy/                                                | 1276398 |
| 2  | ((drug or pharma*) adj2 (therap* or medic*)).tw,kf.              | 86285   |
| 3  | exp Antipsychotic Agents/                                        | 116697  |
| 4  | antipsychotic*.tw,kf.                                            | 31402   |
| 5  | anti-psychotic.tw,kf.                                            | 582     |
| 6  | (antipsychotic* adj2 med*).tw,kf.                                | 5637    |
| 7  | neuroleptic*.tw,kf.                                              | 18442   |
| 8  | antidepressive agents/                                           | 40719   |
| 9  | antidepressant*.tw,kf.                                           | 53204   |
| 10 | "mood stabilizer".tw,kf.                                         | 1091    |
| 11 | exp psychotherapy/                                               | 183946  |
| 12 | psychotherap*.tw,kf.                                             | 39412   |
| 13 | (psycholog* adj2 treat*).tw,kf.                                  | 4445    |
| 14 | "psychological therapy".tw,kf.                                   | 743     |
| 15 | "psychosocial intervention*".tw,kf.                              | 3976    |
| 16 | exp family therapy/                                              | 8555    |
| 17 | (family adj2 (ther* or educ* or psycheduc* or interven*)).tw,kf. | 14262   |
| 18 | exp electroconvulsive therapy/                                   | 12617   |
| 19 | ECT.tw,kf.                                                       | 6732    |
| 20 | "electroconvulsive therapy".tw,kf.                               | 5920    |
| 21 | exp transcranial magnetic stimulation/                           | 10007   |
| 22 | TMS.tw,kf.                                                       | 8997    |
| 23 | "transcranial magnetic stimulation".tw,kf.                       | 11086   |
| 24 | social skill* train*.tw,kf.                                      | 805     |
| 25 | (social skill* adj2 train*).tw.                                  | 848     |
| 26 | life skill* train*.tw,kf.                                        | 123     |
| 27 | (life skill* adj2 train*).tw,kf.                                 | 128     |

|    |                                                 |         |
|----|-------------------------------------------------|---------|
| 28 | exp social support/                             | 65887   |
| 29 | social support.tw,kf.                           | 28934   |
| 30 | exp peer group/                                 | 18949   |
| 31 | peer group.tw,kf.                               | 1629    |
| 32 | peer support.tw,kf.                             | 2781    |
| 33 | exp employment, supported/                      | 1126    |
| 34 | (supp* adj2 empl*).tw,kf.                       | 2455    |
| 35 | (indiv* adj2 place* adj2 support*).tw,kf.       | 211     |
| 36 | psychoeducation.tw,kf.                          | 1913    |
| 37 | interpersonal therapy.tw,kf.                    | 262     |
| 38 | support* education.tw,kf.                       | 482     |
| 39 | "interpersonal and social rhythm*".tw,kf.       | 72      |
| 40 | "behavioral couples therap*".tw,kf.             | 55      |
| 41 | "behavioural couples therap*".tw,kf.            | 1       |
| 42 | Cognitive Remediation/                          | 174     |
| 43 | cognitive remediation.tw,kf.                    | 745     |
| 44 | (cognitive adj2 behavior* adj2 therap*).tw,kf.  | 8444    |
| 45 | (cognitive adj2 behaviour* adj2 therap*).tw,kf. | 4105    |
| 46 | or/1-45                                         | 1803291 |
| 47 | randomized controlled trial.pt.                 | 474725  |
| 48 | controlled clinical trial.pt.                   | 92861   |
| 49 | randomized.ab.                                  | 375543  |
| 50 | placebo.ab.                                     | 177023  |
| 51 | drug therapy.fs.                                | 2077443 |
| 52 | randomly.ab.                                    | 260597  |
| 53 | trial.ab.                                       | 389659  |
| 54 | groups.ab.                                      | 1621490 |
| 55 | 47 or 48 or 49 or 50 or 51 or 52 or 53 or 54    | 4021119 |
| 56 | exp animals/ not humans.sh.                     | 4538799 |
| 57 | 55 not 56                                       | 3431042 |
| 58 | exp ADULT/                                      | 6727504 |
| 59 | adult.tw,kf.                                    | 617683  |
| 60 | exp ADOLESCENT/                                 | 1907907 |

|    |                                                                                 |         |
|----|---------------------------------------------------------------------------------|---------|
| 61 | adolescen*.tw,kf.                                                               | 231519  |
| 62 | teen*.tw,kf.                                                                    | 25160   |
| 63 | or/58-62                                                                        | 7642305 |
| 64 | exp CHILD/                                                                      | 1806389 |
| 65 | (child* or infant* or paediat* or pediat*).tw,kf.                               | 1551146 |
| 66 | 64 or 65                                                                        | 2389093 |
| 67 | 63 not 66                                                                       | 6400260 |
| 68 | ((substance-induced or medication-induced) adj2 (psychotic or psychos*)).tw,kf. | 125     |
| 69 | 46 and 57 and 67 and 68                                                         | 15      |
| 70 | limit 69 to (english language and yr="2013 -Current")                           | 7       |

## Cochrane Highly Sensitive Search Strategy (CHSSS)

Ovid MEDLINE(R) 1946 to January Week 3 2019

**Search Strategy: Other specified and unspecified schizophrenia spectrum and other psychotic disorder; other primary psychotic disorder; unspecified primary psychotic disorder**

26Jan2019

| #  | Searches                                                         | Results |
|----|------------------------------------------------------------------|---------|
| 1  | exp drug therapy/                                                | 1276398 |
| 2  | ((drug or pharma*) adj2 (therap* or medic*)).tw,kf.              | 86285   |
| 3  | exp Antipsychotic Agents/                                        | 116697  |
| 4  | antipsychotic*.tw,kf.                                            | 31402   |
| 5  | anti-psychotic.tw,kf.                                            | 582     |
| 6  | (antipsychotic* adj2 med*).tw,kf.                                | 5637    |
| 7  | neuroleptic*.tw,kf.                                              | 18442   |
| 8  | antidepressive agents/                                           | 40719   |
| 9  | antidepressant*.tw,kf.                                           | 53204   |
| 10 | "mood stabilizer".tw,kf.                                         | 1091    |
| 11 | exp psychotherapy/                                               | 183946  |
| 12 | psychotherap*.tw,kf.                                             | 39412   |
| 13 | (psycholog* adj2 treat*).tw,kf.                                  | 4445    |
| 14 | "psychological therapy".tw,kf.                                   | 743     |
| 15 | "psychosocial intervention*".tw,kf.                              | 3976    |
| 16 | exp family therapy/                                              | 8555    |
| 17 | (family adj2 (ther* or educ* or psycheduc* or interven*)).tw,kf. | 14262   |
| 18 | exp electroconvulsive therapy/                                   | 12617   |
| 19 | ECT.tw,kf.                                                       | 6732    |
| 20 | "electroconvulsive therapy".tw,kf.                               | 5920    |
| 21 | exp transcranial magnetic stimulation/                           | 10007   |
| 22 | TMS.tw,kf.                                                       | 8997    |
| 23 | "transcranial magnetic stimulation".tw,kf.                       | 11086   |
| 24 | social skill* train*.tw,kf.                                      | 805     |
| 25 | (social skill* adj2 train*).tw.                                  | 848     |
| 26 | life skill* train*.tw,kf.                                        | 123     |

|    |                                                 |         |
|----|-------------------------------------------------|---------|
| 27 | (life skill* adj2 train*).tw,kf.                | 128     |
| 28 | exp social support/                             | 65887   |
| 29 | social support.tw,kf.                           | 28934   |
| 30 | exp peer group/                                 | 18949   |
| 31 | peer group.tw,kf.                               | 1629    |
| 32 | peer support.tw,kf.                             | 2781    |
| 33 | exp employment, supported/                      | 1126    |
| 34 | (supp* adj2 empl*).tw,kf.                       | 2455    |
| 35 | (indiv* adj2 place* adj2 support*).tw,kf.       | 211     |
| 36 | psychoeducation.tw,kf.                          | 1913    |
| 37 | interpersonal therapy.tw,kf.                    | 262     |
| 38 | support* education.tw,kf.                       | 482     |
| 39 | "interpersonal and social rhythm*".tw,kf.       | 72      |
| 40 | "behavioral couples therap*".tw,kf.             | 55      |
| 41 | "behavioural couples therap*".tw,kf.            | 1       |
| 42 | Cognitive Remediation/                          | 174     |
| 43 | cognitive remediation.tw,kf.                    | 745     |
| 44 | (cognitive adj2 behavior* adj2 therap*).tw,kf.  | 8444    |
| 45 | (cognitive adj2 behaviour* adj2 therap*).tw,kf. | 4105    |
| 46 | or/1-45                                         | 1803291 |
| 47 | randomized controlled trial.pt.                 | 474725  |
| 48 | controlled clinical trial.pt.                   | 92861   |
| 49 | randomized.ab.                                  | 375543  |
| 50 | placebo.ab.                                     | 177023  |
| 51 | drug therapy.fs.                                | 2077443 |
| 52 | randomly.ab.                                    | 260597  |
| 53 | trial.ab.                                       | 389659  |
| 54 | groups.ab.                                      | 1621490 |
| 55 | 47 or 48 or 49 or 50 or 51 or 52 or 53 or 54    | 4021119 |
| 56 | exp animals/ not humans.sh.                     | 4538799 |
| 57 | 55 not 56                                       | 3431042 |
| 58 | exp ADULT/                                      | 6727504 |
| 59 | adult.tw,kf.                                    | 617683  |

|    |                                                                                |         |
|----|--------------------------------------------------------------------------------|---------|
| 60 | exp ADOLESCENT/                                                                | 1907907 |
| 61 | adolescen*.tw,kf.                                                              | 231519  |
| 62 | teen*.tw,kf.                                                                   | 25160   |
| 63 | or/58-62                                                                       | 7642305 |
| 64 | exp CHILD/                                                                     | 1806389 |
| 65 | (child* or infant* or paediat* or pediat*).tw,kf.                              | 1551146 |
| 66 | 64 or 65                                                                       | 2389093 |
| 67 | 63 not 66                                                                      | 6400260 |
| 68 | "other specified schizophrenia spectrum and other psychotic disorder".tw,kf.   | 1       |
| 69 | "other unspecified schizophrenia spectrum and other psychotic disorder".tw,kf. | 0       |
| 70 | "other primary psychotic disorder*".tw,kf.                                     | 8       |
| 71 | "unspecified primary psychotic disorders".tw,kf.                               | 0       |
| 72 | 68 or 69 or 70 or 71                                                           | 9       |
| 73 | 46 and 57 and 67 and 72                                                        | 0       |

## Cochrane Highly Sensitive Search Strategy (CHSSS)

Ovid MEDLINE(R) 1946 to January Week 3 2019

Search Strategy: Bipolar I Disorder

26 Jan 2019

| #  | Searches                                                         | Results |
|----|------------------------------------------------------------------|---------|
| 1  | exp drug therapy/                                                | 1276398 |
| 2  | ((drug or pharma*) adj2 (therap* or medic*)).tw,kf.              | 86285   |
| 3  | exp Antipsychotic Agents/                                        | 116697  |
| 4  | antipsychotic*.tw,kf.                                            | 31402   |
| 5  | anti-psychotic.tw,kf.                                            | 582     |
| 6  | (antipsychotic* adj2 med*).tw,kf.                                | 5637    |
| 7  | neuroleptic*.tw,kf.                                              | 18442   |
| 8  | antidepressive agents/                                           | 40719   |
| 9  | antidepressant*.tw,kf.                                           | 53204   |
| 10 | "mood stabilizer".tw,kf.                                         | 1091    |
| 11 | exp psychotherapy/                                               | 183946  |
| 12 | psychotherap*.tw,kf.                                             | 39412   |
| 13 | (psycholog* adj2 treat*).tw,kf.                                  | 4445    |
| 14 | "psychological therapy".tw,kf.                                   | 743     |
| 15 | "psychosocial intervention*".tw,kf.                              | 3976    |
| 16 | exp family therapy/                                              | 8555    |
| 17 | (family adj2 (ther* or educ* or psycheduc* or interven*)).tw,kf. | 14262   |
| 18 | exp electroconvulsive therapy/                                   | 12617   |
| 19 | ECT.tw,kf.                                                       | 6732    |
| 20 | "electroconvulsive therapy".tw,kf.                               | 5920    |
| 21 | exp transcranial magnetic stimulation/                           | 10007   |
| 22 | TMS.tw,kf.                                                       | 8997    |
| 23 | "transcranial magnetic stimulation".tw,kf.                       | 11086   |
| 24 | social skill* train*.tw,kf.                                      | 805     |
| 25 | (social skill* adj2 train*).tw.                                  | 848     |
| 26 | life skill* train*.tw,kf.                                        | 123     |
| 27 | (life skill* adj2 train*).tw,kf.                                 | 128     |



|    |                                                 |         |
|----|-------------------------------------------------|---------|
| 28 | exp social support/                             | 65887   |
| 29 | social support.tw,kf.                           | 28934   |
| 30 | exp peer group/                                 | 18949   |
| 31 | peer group.tw,kf.                               | 1629    |
| 32 | peer support.tw,kf.                             | 2781    |
| 33 | exp employment, supported/                      | 1126    |
| 34 | (supp* adj2 empl*).tw,kf.                       | 2455    |
| 35 | (indiv* adj2 place* adj2 support*).tw,kf.       | 211     |
| 36 | psychoeducation.tw,kf.                          | 1913    |
| 37 | interpersonal therapy.tw,kf.                    | 262     |
| 38 | support* education.tw,kf.                       | 482     |
| 39 | "interpersonal and social rhythm*".tw,kf.       | 72      |
| 40 | "behavioral couples therap*".tw,kf.             | 55      |
| 41 | "behavioural couples therap*".tw,kf.            | 1       |
| 42 | Cognitive Remediation/                          | 174     |
| 43 | cognitive remediation.tw,kf.                    | 745     |
| 44 | (cognitive adj2 behavior* adj2 therap*).tw,kf.  | 8444    |
| 45 | (cognitive adj2 behaviour* adj2 therap*).tw,kf. | 4105    |
| 46 | or/1-45                                         | 1803291 |
| 47 | randomized controlled trial.pt.                 | 474725  |
| 48 | controlled clinical trial.pt.                   | 92861   |
| 49 | randomized.ab.                                  | 375543  |
| 50 | placebo.ab.                                     | 177023  |
| 51 | drug therapy.fs.                                | 2077443 |
| 52 | randomly.ab.                                    | 260597  |
| 53 | trial.ab.                                       | 389659  |
| 54 | groups.ab.                                      | 1621490 |
| 55 | 47 or 48 or 49 or 50 or 51 or 52 or 53 or 54    | 4021119 |
| 56 | exp animals/ not humans.sh.                     | 4538799 |
| 57 | 55 not 56                                       | 3431042 |
| 58 | exp ADULT/                                      | 6727504 |
| 59 | adult.tw,kf.                                    | 617683  |
| 60 | exp ADOLESCENT/                                 | 1907907 |

|    |                                                       |         |
|----|-------------------------------------------------------|---------|
| 61 | adolescen*.tw,kf.                                     | 231519  |
| 62 | teen*.tw,kf.                                          | 25160   |
| 63 | or/58-62                                              | 7642305 |
| 64 | exp CHILD/                                            | 1806389 |
| 65 | (child* or infant* or paediat* or pediat*).tw,kf.     | 1551146 |
| 66 | 64 or 65                                              | 2389093 |
| 67 | 63 not 66                                             | 6400260 |
| 68 | "bipolar I disorder".tw,kf.                           | 1825    |
| 69 | "bipolar I".tw,kf.                                    | 2935    |
| 70 | 68 or 69                                              | 2935    |
| 71 | 46 and 57 and 67 and 70                               | 688     |
| 72 | limit 71 to (english language and yr="2013 -Current") | 207     |

## Non-RCT Search Strategy

Database(s): PsycINFO 1806 to April Week 1 2019

Search Strategy: Qualitative: schizophrenia and psychotic disorders

7 April 2019

| #  | Searches                                | Results |
|----|-----------------------------------------|---------|
| 1  | "patient centred".mp.                   | 1353    |
| 2  | "perspective".mp.                       | 187785  |
| 3  | subjective.mp.                          | 85293   |
| 4  | interview*.mp.                          | 375157  |
| 5  | exp Qualitative Research/               | 1       |
| 6  | qualitative.mp.                         | 152413  |
| 7  | exp Focus Groups/                       | 0       |
| 8  | "focus group".mp.                       | 17061   |
| 9  | "priority".mp.                          | 15941   |
| 10 | priorities.mp.                          | 11525   |
| 11 | treatment satisfaction.mp.              | 1080    |
| 12 | or/1-11                                 | 708255  |
| 13 | outcome.mp.                             | 170697  |
| 14 | exp "Outcome Assessment (Health Care)"/ | 0       |
| 15 | domain.mp.                              | 60006   |
| 16 | exp Health/                             | 144312  |
| 17 | health.mp. or exp Health/               | 642457  |
| 18 | dimension.mp.                           | 42961   |
| 19 | status.mp.                              | 247001  |
| 20 | impact.mp.                              | 308968  |
| 21 | measure.mp.                             | 237396  |
| 22 | measur*.mp.                             | 837251  |
| 23 | "treatment goal".mp.                    | 544     |
| 24 | or/13-23                                | 1762640 |
| 25 | randomized controlled trial.pt.         | 0       |
| 26 | "cost-effectiveness".mp.                | 7609    |
| 27 | validity.tw,kf.                         | 147996  |

|    |                                                                                |        |
|----|--------------------------------------------------------------------------------|--------|
| 28 | "measurement properties".tw,kf.                                                | 1102   |
| 29 | reliability.tw,kf.                                                             | 93194  |
| 30 | phase.mp.                                                                      | 82170  |
| 31 | or/25-30                                                                       | 270151 |
| 32 | exp Schizophrenia/                                                             | 86379  |
| 33 | schizophrenia.tw,kf.                                                           | 104815 |
| 34 | schizophrenic disorder*.tw,kf.                                                 | 1360   |
| 35 | or/32-34                                                                       | 116258 |
| 36 | 12 and 24 and 35                                                               | 11250  |
| 37 | 36 not 31                                                                      | 9852   |
| 38 | limit 37 to english language                                                   | 9277   |
| 39 | limit 38 to yr="2014 - 2019"                                                   | 2980   |
| 40 | exp Patient Reported Outcome Measures/                                         | 0      |
| 41 | patient reported outcome*.mp.                                                  | 2274   |
| 42 | outcomes research.mp.                                                          | 1300   |
| 43 | exp Patient Preference/                                                        | 0      |
| 44 | patient preference.mp.                                                         | 579    |
| 45 | 40 or 41                                                                       | 2274   |
| 46 | 43 or 44                                                                       | 579    |
| 47 | 35 and 45 and 46                                                               | 0      |
| 48 | 35 and 42 and 46                                                               | 0      |
| 49 | 35 and 41                                                                      | 31     |
| 50 | from 49 keep 23                                                                | 1      |
|    | ((outcome adj2 assess*) or measure*).mp. or instrument*.tw,kf. [mp=title,      |        |
| 51 | abstract, heading word, table of contents, key concepts, original title, tests | 881123 |
|    | & measures]                                                                    |        |
| 52 | 35 and 46 and 51                                                               | 7      |
| 53 | exp Psychotic Disorders/                                                       | 0      |
| 54 | psychosis.tw,kf.                                                               | 42655  |
| 55 | psychosis.mp.                                                                  | 52535  |
| 56 | psychoses.tw,kf.                                                               | 15002  |
| 57 | "psychotic disorder".tw,kf.                                                    | 3064   |
| 58 | (psychotic adj2 disorder*).tw,kf.                                              | 10229  |

|    |                                                     |        |
|----|-----------------------------------------------------|--------|
| 59 | or/53-58                                            | 64302  |
| 60 | 35 or 59                                            | 155781 |
| 61 | 12 and 24 and 60                                    | 14632  |
| 62 | 61 not 31                                           | 12849  |
| 63 | or/40-44                                            | 4098   |
| 64 | 51 or 63                                            | 882708 |
| 65 | 12 and 51 and 60                                    | 7877   |
| 66 | 65 not 31                                           | 6500   |
| 67 | limit 66 to (english language and yr="2014 - 2019") | 2055   |
| 68 | 12 and 51 and 60 and 24                             | 7488   |
| 69 | 68 not 31                                           | 6246   |
| 70 | limit 69 to (english language and yr="2014 - 2019") | 2018   |

**Non-RCT Search Strategy**  
**PsycINFO 1806 to April Week 2 2019**  
**Search Strategy: Bipolar I qualitative**  
**13 April 2019**

| #  | Searches                                | Results |
|----|-----------------------------------------|---------|
| 1  | "patient centred".mp.                   | 1353    |
| 2  | "perspective".mp.                       | 187886  |
| 3  | subjective.mp.                          | 85366   |
| 4  | interview*.mp.                          | 375437  |
| 5  | exp Qualitative Research/               | 1       |
| 6  | qualitative.mp.                         | 152543  |
| 7  | exp Focus Groups/                       | 0       |
| 8  | "focus group".mp.                       | 17073   |
| 9  | "priority".mp.                          | 15954   |
| 10 | priorities.mp.                          | 11534   |
| 11 | treatment satisfaction.mp.              | 1081    |
| 12 | or/1-11                                 | 708759  |
| 13 | outcome.mp.                             | 170822  |
| 14 | exp "Outcome Assessment (Health Care)"/ | 0       |

|    |                                                     |         |
|----|-----------------------------------------------------|---------|
| 15 | domain.mp.                                          | 60053   |
| 16 | exp Health/                                         | 144418  |
| 17 | health.mp. or exp Health/                           | 643057  |
| 18 | dimension.mp.                                       | 42985   |
| 19 | status.mp.                                          | 247172  |
| 20 | impact.mp.                                          | 309255  |
| 21 | measure.mp.                                         | 237651  |
| 22 | measur*.mp.                                         | 837917  |
| 23 | "treatment goal".mp.                                | 544     |
| 24 | or/13-23                                            | 1763978 |
| 25 | randomized controlled trial.pt.                     | 0       |
| 26 | "cost-effectiveness".mp.                            | 7615    |
| 27 | validity.tw,kf.                                     | 148094  |
| 28 | "measurement properties".tw,kf.                     | 1104    |
| 29 | reliability.tw,kf.                                  | 93244   |
| 30 | phase.mp.                                           | 82224   |
| 31 | or/25-30                                            | 270323  |
| 32 | exp Patient Reported Outcome Measures/              | 0       |
| 33 | patient reported outcome*.mp.                       | 2277    |
| 34 | outcomes research.mp.                               | 1300    |
| 35 | exp Patient Preference/                             | 0       |
| 36 | patient preference.mp.                              | 579     |
| 37 | bipolar I disorder.mp.                              | 2423    |
| 38 | bipolar I.tw,kf.                                    | 3343    |
| 39 | 37 or 38                                            | 3344    |
| 40 | 12 and 39                                           | 1422    |
| 41 | 40 not 31                                           | 1255    |
| 42 | or/32-36                                            | 4101    |
| 43 | 39 and 42                                           | 0       |
| 44 | limit 41 to (english language and yr="2014 - 2019") | 389     |
| 45 | exp Qualitative Research/                           | 1       |
| 46 | focus group.mp.                                     | 17073   |
| 47 | 12 or 42                                            | 711588  |

|    |                                                     |        |
|----|-----------------------------------------------------|--------|
| 48 | 39 and 47                                           | 1422   |
| 49 | 48 not 31                                           | 1255   |
| 50 | 12 and 24                                           | 350847 |
| 51 | 12 or 42                                            | 711588 |
| 52 | 24 and 51                                           | 353277 |
| 53 | 39 and 52                                           | 770    |
| 54 | 53 not 31                                           | 677    |
| 55 | limit 54 to (english language and yr="2014 - 2019") | 218    |
| 56 | from 55 keep 1-218                                  | 218    |

**Non-RCT Search Strategy**  
**Ovid MEDLINE(R) <1946 to March Week 2 2019>**  
**Search strategy: Schizophrenia (non-RCT)**

| #  | Searches                                | Results |
|----|-----------------------------------------|---------|
| 1  | "patient centred".mp.                   | 4096    |
| 2  | "perspective".mp.                       | 150552  |
| 3  | subjective.mp.                          | 102553  |
| 4  | interview*.mp.                          | 311403  |
| 5  | exp Qualitative Research/               | 44418   |
| 6  | qualitative.mp.                         | 177368  |
| 7  | exp Focus Groups/                       | 26231   |
| 8  | "focus group".mp.                       | 17132   |
| 9  | "priority".mp.                          | 47043   |
| 10 | priorities.mp.                          | 30744   |
| 11 | treatment satisfaction.mp.              | 2229    |
| 12 | or/1-11                                 | 735709  |
| 13 | outcome.mp.                             | 1610781 |
| 14 | exp "Outcome Assessment (Health Care)"/ | 985616  |
| 15 | domain.mp.                              | 392071  |
| 16 | exp Health/                             | 335120  |

|    |                                 |         |
|----|---------------------------------|---------|
| 17 | health.mp. or exp Health/       | 2413096 |
| 18 | dimension.mp.                   | 56082   |
| 19 | status.mp.                      | 888756  |
| 20 | impact.mp.                      | 699480  |
| 21 | measure.mp.                     | 427258  |
| 22 | measur*.mp.                     | 2866105 |
| 23 | "treatment goal".mp.            | 1321    |
| 24 | or/13-23                        | 7009834 |
| 25 | randomized controlled trial.pt. | 476997  |
| 26 | "cost-effectiveness".mp.        | 45539   |
| 27 | validity.tw,kf.                 | 132311  |
| 28 | "measurement properties".tw,kf. | 1886    |
| 29 | reliability.tw,kf.              | 125376  |
| 30 | phase.mp.                       | 771847  |
| 31 | or/25-30                        | 1448074 |
| 32 | exp Schizophrenia/              | 99992   |
| 33 | schizophrenia.tw,kf.            | 93493   |
| 34 | schizophrenic disorder*.tw,kf.  | 969     |
| 35 | or/32-34                        | 122492  |
| 36 | 12 and 24 and 35                | 6573    |
| 37 | 36 not 31                       | 5273    |
| 38 | limit 37 to english language    | 4797    |
| 39 | limit 38 to yr="2014 - 2019"    | 1079    |

### Non-RCT Search Strategy

Ovid MEDLINE(R) 1946 to April Week 1 2019

Search Strategy: Bipolar I (non-RCT)

13 April 2019

| # | Searches | Results |
|---|----------|---------|
|---|----------|---------|



|    |                                         |         |
|----|-----------------------------------------|---------|
| 1  | "patient centred".mp.                   | 4155    |
| 2  | "perspective".mp.                       | 151674  |
| 3  | subjective.mp.                          | 103158  |
| 4  | interview*.mp.                          | 313237  |
| 5  | exp Qualitative Research/               | 45096   |
| 6  | qualitative.mp.                         | 178886  |
| 7  | exp Focus Groups/                       | 26450   |
| 8  | "focus group".mp.                       | 17328   |
| 9  | "priority".mp.                          | 47386   |
| 10 | priorities.mp.                          | 30914   |
| 11 | treatment satisfaction.mp.              | 2243    |
| 12 | or/1-11                                 | 740392  |
| 13 | outcome.mp.                             | 1621246 |
| 14 | exp "Outcome Assessment (Health Care)"/ | 992383  |
| 15 | domain.mp.                              | 393940  |
| 16 | exp Health/                             | 336879  |
| 17 | health.mp. or exp Health/               | 2426278 |
| 18 | dimension.mp.                           | 56367   |
| 19 | status.mp.                              | 893542  |
| 20 | impact.mp.                              | 705463  |
| 21 | measure.mp.                             | 429811  |
| 22 | measur*.mp.                             | 2879809 |
| 23 | "treatment goal".mp.                    | 1326    |
| 24 | or/13-23                                | 7046460 |
| 25 | randomized controlled trial.pt.         | 479112  |
| 26 | "cost-effectiveness".mp.                | 45859   |
| 27 | validity.tw,kf.                         | 133125  |
| 28 | "measurement properties".tw,kf.         | 1912    |
| 29 | reliability.tw,kf.                      | 126211  |
| 30 | phase.mp.                               | 775022  |
| 31 | or/25-30                                | 1454626 |
| 32 | exp Patient Reported Outcome Measures/  | 2909    |
| 33 | patient reported outcome*.mp.           | 11064   |

|    |                                                     |       |
|----|-----------------------------------------------------|-------|
| 34 | outcomes research.mp.                               | 4200  |
| 35 | exp Patient Preference/                             | 7047  |
| 36 | patient preference.mp.                              | 9668  |
| 37 | bipolar I disorder.mp.                              | 1853  |
| 38 | bipolar I.tw,kf.                                    | 2966  |
| 39 | 37 or 38                                            | 2966  |
| 40 | 12 and 39                                           | 564   |
| 41 | 40 not 31                                           | 446   |
| 42 | or/32-36                                            | 24585 |
| 43 | 39 and 42                                           | 4     |
| 44 | limit 41 to (english language and yr="2014 - 2019") | 101   |

## Outcome measures identified through the systematic literature searches

| <b>Measure name</b>                                          | <b>Abbreviation</b> |
|--------------------------------------------------------------|---------------------|
| Abnormal Involuntary Movement Scale                          | AIMS                |
| Altman Self-rating Mania Scale                               | ASRM                |
| Attentional Resource Allocation Scale                        | ARAS                |
| Auditory Hallucination Rating Scale                          | AHRS                |
| Barnes Akathisia Rating Scale                                | BARS                |
| Bech-Rafaelsen Mania Rating Scale                            | MAS                 |
| Beliefs about Medication                                     | BMQ                 |
| Bipolar Inventory of Signs and Symptoms                      | BISS                |
| Bipolar Recovery Questionnaire                               | BRQ                 |
| Brief COPE Inventory                                         | Brief COPE          |
| Brief Life Satisfaction Scales                               | BLSS                |
| Brief Negative Symptom Assessment                            | BNSA                |
| Brief Negative Symptom Scale                                 | BNSS                |
| Brief Psychiatric Rating Scale                               | BPRS                |
| Calgary Depression Scale for Schizophrenia                   | CDSS                |
| California Quality of Life                                   | CA-QOL              |
| Centre for Epidemiological Studies - Depression Scale        | CES-D               |
| Children's Global Assessment Scale                           | CGAS                |
| Clinical assessment interview for negative symptoms          | CAINS               |
| Clinical Global Impressions                                  | CGI                 |
| Clinical Global Impressions – Bipolar Scale                  | CGI-BP              |
| Clinical Global Impressions – Schizoaffective Disorder Scale | CGI-SCA             |
| Clinical Global Impressions – Schizophrenia Scale            | CGI-SCH             |
| Clinical Outcomes in Routine Evaluation Outcome Measure      | CORE-OM             |
| Clinician-Rated Dimensions of Psychosis Symptom Severity     | CRDPSS              |
| Columbia Suicide Severity Rating Scale                       | C-SSRS              |
| Comprehensive Assessment of At-Risk Mental Health States     | CAARMS              |
| Depression, Anxiety and Stress Scales, 21-item               | DASS 21             |
| Depression, Anxiety and Stress Scales, 41-item               | DASS 41             |
| DIALOG scale                                                 | DIALOG              |
| Edinburgh Postnatal Depression Scale                         | EPDS                |
| EUROQOL 5D                                                   | EQ-5D               |
| Extrapyramidal Symptom Rating Scale                          | ESRS                |
| Functional Assessment Short Test                             | FAST                |
| Functional Remission of General Schizophrenia                | FROGS               |
| General Behaviour Inventory                                  | GBI                 |
| Generalised Anxiety Disorder Scale, 7-item                   | GAD7                |
| Glasgow Antipsychotic Side-effect Scale                      | GASS                |
| Global Assessment of Functioning                             | GAF                 |

| <b>Measure name</b>                                                             | <b>Abbreviation</b> |
|---------------------------------------------------------------------------------|---------------------|
| Global Functioning: Social and Role Scales                                      | GF:Social & GF:Role |
| Hamilton Rating Scale for Depression                                            | HAM-D               |
| Health of the Nation Outcome Scales                                             | HoNOS               |
| Health of the Nation Outcome Scales for Children and Adolescents                | HoNOS-CA            |
| Health Utilities Index                                                          | HUI                 |
| Hypomanic Attitudes and Positive Predictions Inventory                          | HAPPI               |
| Illness Management and Recovery Scale                                           | IMRS                |
| INSPIRE                                                                         | INSPIRE             |
| Internal States Scale                                                           | ISS                 |
| Internal States Scale                                                           | ISS                 |
| Inventory of Depressive Symptomatology                                          | IDS                 |
| Kessler Psychological Distress Scale                                            | K10                 |
| KIDSCREEN                                                                       | KIDSCREEN           |
| Lancashire Quality of Life Profile                                              | LQLP                |
| Longitudinal Interval Follow-up Evaluation                                      | LIFE                |
| Manchester Short Assessment of Quality of Life                                  | MANSA               |
| Mental Health Inventory                                                         | MHI                 |
| Mental Health Recovery Measure                                                  | MHRM                |
| Mental Health Statistics Improvement Program Adult Consumer Satisfaction Survey | MHSIP-Consumer      |
| Montgomery Asberg Depression Rating Scale                                       | MADRS               |
| Multi-Phase Recovery Measure                                                    | MPRM                |
| My Mood Monitor                                                                 | M-3                 |
| Negative Symptom Assessment Tool                                                | NSA-4               |
| Ohio Mental Health Consumer Outcomes System                                     | OMHCOS              |
| Patient Health Questionnaire, 9-item                                            | PHQ-9               |
| Peer Outcomes Protocol                                                          | POP                 |
| Personal Outcome Measure                                                        | POM                 |
| Personal Vision of Recovery Questionnaire                                       | PVRQ                |
| Personal Well-being Index                                                       | PWI                 |
| Positive Symptoms Rating Scale                                                  | PSRS                |
| PROMIS Global Health 1.2                                                        | PROMIS GH           |
| PROMIS Profile 29                                                               | PROMIS Profile      |
| Psychological General Well-Being Index                                          | PGWBI               |
| Psychological Wellbeing Scale                                                   | PWB                 |
| Psychotic Symptom Rating Scales                                                 | PSYRATS             |
| Quality of Life Enjoyment and Satisfaction Questionnaire – Short Form           | Q-LES-Q-SF          |
| Quality of Life in Bipolar Questionnaire                                        | QoL.BD              |
| Quality of Life in Schizophrenia                                                | QLIS                |
| Quality of Life Scale                                                           | QOLS                |
| Questionnaire about the Process of Recovery                                     | QPR                 |

| <b>Measure name</b>                                                | <b>Abbreviation</b> |
|--------------------------------------------------------------------|---------------------|
| Questionnaire about the Process of Recovery                        | QPR                 |
| Quick Inventory of Depressive Symptomatology – Self-Report 16-item | QIDS-SR-16          |
| Range of Impaired Functioning Tool                                 | LIFE-RIFT           |
| Recovering Quality of Life                                         | ReQoL               |
| Recovery Assessment Scale                                          | RAS                 |
| Recovery Assessment Scale – Domains and Stages                     | RAS-DS              |
| Recovery Attitudes Questionnaire                                   | RAQ-7               |
| Recovery Index                                                     | RI                  |
| Recovery Measurement Tool                                          | RMT                 |
| Recovery Oriented System Indicators                                | ROSI                |
| Recovery Process Inventory                                         | RPI                 |
| Recovery Questionnaire for Young People                            | ReQuest-YP          |
| Relapse Risk Assessment for Schizophrenia Patients                 | RASP                |
| Relationships and Activities that Facilitate Recovery Survey       | RAFRS               |
| Resourcefulness Skills Scale                                       | RSS                 |
| Rochester Recovery Inquiry                                         | RRI                 |
| Satisfaction with Life Domains Scale                               | SLDS                |
| Satisfaction with Life Scale                                       | SWLS                |
| Scale for Assessment of Negative Symptoms                          | SANS                |
| Scale for Assessment of Positive Symptoms                          | SAPS                |
| Schedule for Affective Disorders and Schizophrenia                 | SADS                |
| Schedule for Affective Disorders and Schizophrenia                 | SADS                |
| Schizophrenia Cognition Rating Scale                               | ScoRS               |
| Schizophrenia Quality of Life Questionnaire                        | S-QoL               |
| Schizophrenia Quality of Life Scale                                | SQLS                |
| Self-Report Manic Inventory                                        | SRMI                |
| Short Form Health Survey 36                                        | SF-36               |
| Social and Occupational Functioning Assessment Scale               | SOFAS               |
| Social Behaviour Schedule                                          | SBS                 |
| Social Functioning Scale                                           | SFS                 |
| Social Inclusion Questionnaire                                     | SIQ                 |
| Social Responsiveness Scale                                        | SRS                 |
| Somatic and Psychological Health Report Questionnaire              | SPHERE-12           |
| Specific Levels of Functioning Scale                               | SLOF                |
| St. Hans Rating Scale                                              | SHRS                |
| Stages of Recovery Instrument                                      | STORI               |
| Strengths and Difficulties Questionnaire                           | SDQ                 |
| Subjective Experiences of Psychosis Scale                          | SEPS                |
| Subjective Quality of Life Profile                                 | SQLP                |
| Suicidal Behaviours Questionnaire - Revised                        | SBQ-R               |
| Suicide Ideation Scale                                             | SIS                 |
| Treatment Emergent Symptom Scale                                   | TESS                |
| University of California Performance Skills Assessment – Brief     | UPSA-B              |

**Measure name**

Warwick-Edinburgh Mental Wellbeing Scale

WHO Disability Assessment Schedule 2.0

WHO Quality of Life

WHO Quality of Life-BREF

Wisconsin Quality of Life Index

Work and Social Adjustment Scale

Young Mania Rating Scale

Youth Outcomes Questionnaire - 30-item

**Abbreviation**

WEMWBS

WHODAS 2.0

WHOQoL

WHOQOL-

BREF

W-QLI

WSAS

YMRS

YOQ

## Outcome measures presented to the consensus working group for voting

| <b>Measure Name</b>                                                                          | <b>Abbreviation</b> |
|----------------------------------------------------------------------------------------------|---------------------|
| Abnormal Involuntary Movement Scale                                                          | AIMS                |
| Altman Self-rating Mania Scale                                                               | ASRM                |
| Ask Suicide-screening Questions                                                              | ASQ                 |
| Bipolar Recovery Questionnaire                                                               | BRQ                 |
| Brief Negative Symptom Assessment                                                            | BNSA                |
| Calgary Depression Scale for Schizophrenia                                                   | CDSS                |
| Centre for Epidemiological Studies Depression Scale                                          | CES-D               |
| Clinical Global Impressions                                                                  | CGI                 |
| Clinical Outcomes in Routine Evaluation – 10-item                                            | CORE-10             |
| Clinical Outcomes in Routine Evaluation – Outcome Measure                                    | CORE-OM             |
| Columbia Suicide Severity Rating Scale                                                       | C-SSRS              |
| Depression, Anxiety and Stress Scales, 21-item                                               | DASS 21             |
| Depression, Anxiety and Stress Scales, 41-item                                               | DASS 41             |
| EUROQOL 5D                                                                                   | EQ-5D               |
| Glasgow Antipsychotic Side-effect Scale                                                      | GASS                |
| Health-Related Quality of Life Questionnaire for Children and Young People and their Parents | KIDSCREEN           |
| Health of the Nation Outcome Scales                                                          | HoNOS               |
| Health of the Nation Outcome Scales for Children and Adolescents                             | HoNOS-CA            |
| ICECAP-A capability measure                                                                  | ICECAP              |
| Inventory of Depressive Symptomatology                                                       | IDS                 |
| Illness Management and Recovery Scale                                                        | IMRS                |
| INSPIRE                                                                                      | INSPIRE             |
| Internal States Scale                                                                        | ISS                 |
| Mental Health Recovery Measure                                                               | MHRM                |
| Modified Colorado Symptom Index                                                              | MCSI                |
| Negative Symptom Assessment Tool                                                             | NSA-4               |
| Patient Health Questionnaire, 15-item                                                        | PHQ-15              |
| Patient Health Questionnaire, 9-item                                                         | PHQ-9               |
| Personal Wellbeing Index                                                                     | PWI                 |
| Positive Symptoms Rating Scale                                                               | PSRS                |
| PROMIS Emotional Distress                                                                    | PROMIS ED           |

| <b>Measure Name</b>                                                                                                                     | <b>Abbreviation</b>   |
|-----------------------------------------------------------------------------------------------------------------------------------------|-----------------------|
| PROMIS Global Health 1.2                                                                                                                | PROMIS GH             |
| PROMIS Profile 29                                                                                                                       | PROMIS Profile        |
| PROMIS Pediatric Profile 25                                                                                                             | PROMIS Profile<br>25  |
| PROMIS Sleep Disturbance Short Form 4a                                                                                                  | PROMIS Sleep SF<br>4a |
| Quality of Life Enjoyment and Satisfaction Questionnaire – Short Form<br>(Quick) Inventory of Depression Symptomatology – Self-reported | Q-LES-Q-SF<br>QIDS-SR |
| Quality of Life in Bipolar Questionnaire                                                                                                | QoL-BD                |
| Quality of Life Scale                                                                                                                   | QOLS                  |
| Questionnaire about the Process of Recovery                                                                                             | QPR                   |
| Recovery Assessment Scale                                                                                                               | RAS                   |
| Recovery Assessment Scale – Domains and Stages                                                                                          | RAS-DS                |
| Recovering Quality of Life                                                                                                              | ReQoL                 |
| Recovery Questionnaire for Young People                                                                                                 | ReQuest-YP            |
| Schizophrenia Quality of Life Questionnaire                                                                                             | S-QoL                 |
| Schizophrenia Quality of Life Scale                                                                                                     | SQLS                  |
| Scale for Assessment of Negative Symptoms                                                                                               | SANS                  |
| Scale for Assessment of Positive Symptoms                                                                                               | SAPS                  |
| Short Form Health Survey, 36-item                                                                                                       | SF-36                 |
| Stages of Recovery Instrument                                                                                                           | STORI                 |
| Suicidal Behaviours Questionnaire – Revised                                                                                             | SBQ-R                 |
| Suicide Ideation Scale                                                                                                                  | SIS                   |
| Warwick-Edinburgh Mental Wellbeing Scale                                                                                                | WEMWBS                |
| WHO Disability Assessment Schedule 2.0                                                                                                  | WHODAS 2.0            |
| WHO Quality of Life                                                                                                                     | WHOQoL                |
| WHO Quality of Life-BREF                                                                                                                | WHOQOL-BREF           |
| Work and Social Adjustment Scale                                                                                                        | WSAS                  |
